# Supplementary material for: LncRNA PCAT19 induced by SP1 and acted as oncogene in gastric cancer competitively binding to miR429 and upregulating DHX9
Source: PubMed Central journal article supplement (PMC8692695; doi:10.7150/jca.61961), 2022-01-01
Supplement: jcav13p0102s1.pdf [file jcav13p0102s1.pdf]

**A**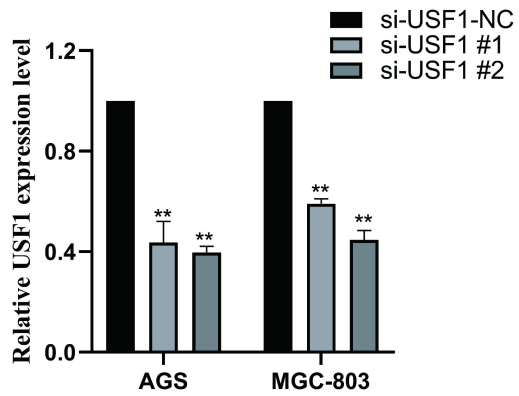**B**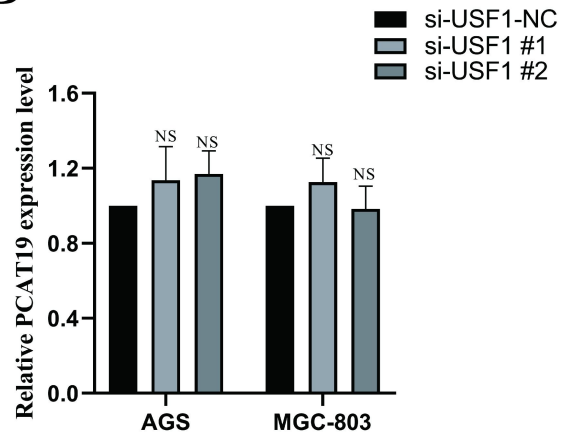

Supplementary Figure 1 USF1 can not activated PACT19 transcription.

A: Expression of USF1 detected by qRT-PCR after transfection of siRNA;

B: Knockdown of TF USF1 expression can not effect the expression of PACT19.

**Table S1. Primers used for qRT-PCR, RT-PCR, and siRNAs oligonucleotides**

---

| <b>Primers used for qRT-PCR</b> |                           |
|---------------------------------|---------------------------|
| PCAT19-F                        | TCAGAACAGGGAACCATTGG      |
| PCAT19-R                        | CAAGAAGATTCTTATCAGCT      |
| GAPDH-F                         | GCTCTCTGCTCCTCCTGTTC      |
| GAPDH-R                         | ACGACCAAATCCGTTGACTC      |
| SP1-F                           | GCACCTGCCCCTACTGTAAA      |
| SP1-R                           | GTGCCTCTGTAGCTCATCCG      |
| USF1-F                          | CTGCTGTTGTTACTACCCAGG     |
| USF1-R                          | TCTGACTTCGGGGAATAAGGG     |
| miR-429-F                       | UAAUACUGUCUGGUAACCCGU     |
| miR-429-R                       | GGUUUUACCAGACAGUAUUAUU    |
| <br>                            |                           |
| <b>siRNAs oligonucleotides</b>  |                           |
| si-NC                           | CUCUCGGAACAUGUCACAU       |
| si-PCAT19 #1                    | CCUGCAAUUUGGUCUAAAU       |
| si-PCAT19 #1                    | GCUCUUCUUUAAGCAAUUAU      |
| si-SP1-NC                       | UUCUCCGAACGUGUCACGUATAT   |
| si-SP1 #1                       | CAGCGUUUCUGCAGCUACCUUGACU |
| si-SP1 #2                       | GACAGGUCAGUUGGCAGACUCUACA |

---

**Table S2 lncRNAs expression level in GSE106815 and GSE109476 datasets**

| Ensembl_ID             | Symbol        | Biotype                            |
|------------------------|---------------|------------------------------------|
| ENSG00000238009        | AL627309.1    | lincRNA                            |
| ENSG00000241860        | AL627309.5    | processed_transcript               |
| ENSG00000228463        | AP006222.1    | transcribed_processed_pseudogene   |
| ENSG00000237094        | AL732372.2    | transcribed_unprocessed_pseudogene |
| ENSG00000230021        | AL669831.3    | transcribed_processed_pseudogene   |
| ENSG00000231609        | AC007098.1    | antisense                          |
| ENSG00000222041        | CYTOR         | lincRNA                            |
| ENSG00000177738        | AC025171.1    | sense_overlapping                  |
| ENSG00000261568        | AL359694.2    | lincRNA                            |
| ENSG00000253552        | HOXA-AS2      | antisense                          |
| ENSG00000281103        | TRG-AS1       | antisense                          |
| ENSG00000248538        | AC022784.1    | lincRNA                            |
| ENSG00000231052        | AL353614.1    | lincRNA                            |
| ENSG00000224511        | LINC00365     | lincRNA                            |
| ENSG00000262712        | AC012676.1    | sense_intronic                     |
| ENSG00000234899        | SOX9-AS1      | processed_transcript               |
| <b>ENSG00000267107</b> | <b>PCAT19</b> | <b>lincRNA</b>                     |
| ENSG00000237945        | LINC00649     | antisense                          |
| ENSG00000206195        | DUXAP8        | processed_transcript               |

**Table S3 Potential transcription factor in the PCAT19 promoter**

| <b>Regulator</b> | <b>Official Full Name</b>                                | <b>U1kb Sample</b> | <b>D1kb Sample</b> | <b>U1kb Total Site</b> | <b>D1kb Total Site</b> |
|------------------|----------------------------------------------------------|--------------------|--------------------|------------------------|------------------------|
| USF2             | upstream transcription factor 1                          | 16                 | 0                  | 16                     | 0                      |
| MAX              | MYC associated factor X                                  | 10                 | 0                  | 10                     | 0                      |
| FOS              | FBJ murine osteosarcoma viral oncogene homolog           | 6                  | 0                  | 6                      | 0                      |
| FOSL2            | FOS-like antigen 2                                       | 5                  | 0                  | 5                      | 0                      |
| TCF7L2           | transcription factor 7-like 2 (T-cell specific, HMG-box) | 5                  | 0                  | 5                      | 0                      |
| ESR1             | estrogen receptor 1                                      | 4                  | 0                  | 4                      | 0                      |
| FOXM1            | forkhead box M1                                          | 4                  | 0                  | 4                      | 0                      |
| JUND             | jun D proto-oncogene                                     | 4                  | 0                  | 4                      | 0                      |
| E2F6             | E2F transcription factor 6                               | 3                  | 0                  | 3                      | 0                      |
| NFIC             | nuclear factor I/C (CCAAT-binding transcription factor)  | 3                  | 0                  | 3                      | 0                      |
| NKX2-1           | NK2 homeobox 1                                           | 3                  | 0                  | 3                      | 0                      |
| USF2             | upstream transcription factor 2, c-fos interacting       | 3                  | 0                  | 3                      | 0                      |
| ESR2             | estrogen receptor 2 (ER beta)                            | 2                  | 0                  | 2                      | 0                      |
| FOSL1            | FOS-like antigen 1                                       | 2                  | 0                  | 2                      | 0                      |
| JUN              | jun proto-oncogene                                       | 2                  | 0                  | 2                      | 0                      |
| MYC              | v-myc avian myelocytomatosis viral oncogene homolog      | 2                  | 0                  | 2                      | 0                      |
| NFYB             | nuclear transcription factor Y subunit beta              | 2                  | 0                  | 2                      | 0                      |
| SP1              | Sp1 transcription factor                                 | 2                  | 0                  | 2                      | 0                      |
| ZNF384           | zinc finger protein 384                                  | 2                  | 0                  | 2                      | 0                      |
| ATF3             | activating transcription factor 3                        | 1                  | 0                  | 1                      | 0                      |
| E2F2             | E2F transcription factor 2                               | 1                  | 0                  | 1                      | 0                      |
| E2F4             | E2F transcription factor 4, p107/p130-binding            | 1                  | 0                  | 1                      | 0                      |
| FOXA1            | forkhead box A1                                          | 1                  | 0                  | 1                      | 0                      |
| FOXA2            | forkhead box A2                                          | 1                  | 0                  | 1                      | 0                      |
| GABPA            | GA binding protein transcription factor alpha subunit    | 1                  | 0                  | 1                      | 0                      |
| KDM5A            | lysine (K)-specific demethylase 5A                       | 1                  | 0                  | 1                      | 0                      |
| MECOM            | MDS1 and EVI1 complex locus                              | 1                  | 0                  | 1                      | 0                      |
| NR2F2            | nuclear receptor subfamily 2 group F member 2            | 1                  | 0                  | 1                      | 0                      |
| PBX1             | pre-B-cell leukemia homeobox 1                           | 1                  | 0                  | 1                      | 0                      |
| SOX2             | SRY-box 2                                                | 1                  | 0                  | 1                      | 0                      |
| TCF12            | transcription factor 12                                  | 1                  | 0                  | 1                      | 0                      |



**Table S4 Positive enrichment score of TFs in PCAT19 from JASPAR analysis**

| Name     | Score   | Relative score | Sequence ID                     | Start | End  | Strand | Predicted sequence   |
|----------|---------|----------------|---------------------------------|-------|------|--------|----------------------|
| SP1      | 8.5066  | 0.88358664     | NC_000019.10:c41454168-41452169 | 1527  | 1536 | +      | AGGGCATGGT           |
| SP1      | 7.71783 | 0.856073107    | NC_000019.10:c41454168-41452169 | 98    | 107  | +      | GGGGTGTGT            |
| SP1      | 7.19766 | 0.837928744    | NC_000019.10:c41454168-41452169 | 95    | 104  | +      | TTGGGGGTGT           |
| SP1      | 6.62561 | 0.817974759    | NC_000019.10:c41454168-41452169 | 133   | 142  | +      | GAGACAGGGT           |
| SP1      | 6.33692 | 0.807904598    | NC_000019.10:c41454168-41452169 | 1288  | 1297 | +      | AGGGCAGGGC           |
| SP1      | 6.33692 | 0.807904598    | NC_000019.10:c41454168-41452169 | 1522  | 1531 | +      | AGGGCAGGGC           |
| SP1      | 6.15904 | 0.801699912    | NC_000019.10:c41454168-41452169 | 1185  | 1194 | +      | GAGGGCTGGT           |
| USF1     | 7.79957 | 0.872967864    | NC_000019.10:c41454168-41452169 | 996   | 1002 | +      | CATGTGA              |
| USF1     | 7.0683  | 0.847803352    | NC_000019.10:c41454168-41452169 | 426   | 432  | +      | CAGGTGG              |
| USF1     | 7.0683  | 0.847803352    | NC_000019.10:c41454168-41452169 | 1403  | 1409 | +      | CAAGTGG              |
| USF1     | 7.02    | 0.846141084    | NC_000019.10:c41454168-41452169 | 417   | 423  | +      | CACCTGG              |
| USF1     | 6.50057 | 0.82826659     | NC_000019.10:c41454168-41452169 | 739   | 745  | +      | CAAGTGA              |
| USF1     | 6.50057 | 0.82826659     | NC_000019.10:c41454168-41452169 | 1237  | 1243 | +      | CAAGTGA              |
| USF1     | 5.79746 | 0.804071201    | NC_000019.10:c41454168-41452169 | 914   | 920  | +      | CAGGTGT              |
| USF1     | 5.79746 | 0.804071201    | NC_000019.10:c41454168-41452169 | 1482  | 1488 | +      | CAAGTGT              |
| E2F1     | 6.00106 | 0.858305906    | NC_000019.10:c41454168-41452169 | 1513  | 1523 | +      | GGAGCAGGAAG          |
| E2F1     | 5.40621 | 0.849356656    | NC_000019.10:c41454168-41452169 | 1591  | 1601 | +      | AACCCGGGAGG          |
| E2F1     | 5.1546  | 0.845571261    | NC_000019.10:c41454168-41452169 | 1119  | 1129 | +      | ACCGCGCCAGG          |
| E2F1     | 4.47704 | 0.835377435    | NC_000019.10:c41454168-41452169 | 1377  | 1387 | +      | GAGGAGGCAGC          |
| E2F1     | 4.47704 | 0.835377435    | NC_000019.10:c41454168-41452169 | 1380  | 1390 | +      | GAGGCAGCAGC          |
| MAX      | 4.18849 | 0.834033592    | NC_000019.10:c41454168-41452169 | 414   | 423  | +      | AGTCACCTGG           |
| MAX::MYC | 8.76116 | 0.820022275    | NC_000019.10:c41454168-41452169 | 423   | 433  | +      | GTCCAGGTGGT          |
| E2F4     | 5.78509 | 0.83642348     | NC_000019.10:c41454168-41452169 | 1514  | 1524 | +      | GAGCAGGAAGG          |
| E2F4     | 5.12795 | 0.826016976    | NC_000019.10:c41454168-41452169 | 1592  | 1602 | +      | AACCCGGGAGGT         |
| E2F4     | 4.30553 | 0.812993124    | NC_000019.10:c41454168-41452169 | 684   | 694  | +      | AGGCTGGAATG          |
| E2F4     | 4.09461 | 0.80965305     | NC_000019.10:c41454168-41452169 | 1120  | 1130 | +      | CCGCGCCAGGC          |
| E2F4     | 3.81028 | 0.805150294    | NC_000019.10:c41454168-41452169 | 1936  | 1946 | +      | TGGCTGGAGTG          |
| TCF7L2   | 10.1342 | 0.882493524    | NC_000019.10:c41454168-41452169 | 1263  | 1276 | +      | AAAGCTCAAAGCAG       |
| TCF7L2   | 8.25335 | 0.856499603    | NC_000019.10:c41454168-41452169 | 1311  | 1324 | +      | TGTGATGAAAGTAT       |
| TCF7L2   | 6.36538 | 0.830407293    | NC_000019.10:c41454168-41452169 | 1738  | 1751 | +      | AATAATCAAAACCA       |
| TCF7L2   | 6.04023 | 0.825913671    | NC_000019.10:c41454168-41452169 | 1694  | 1707 | +      | AAAGAAAAAAAGAA       |
| TCF7L2   | 5.99609 | 0.825303571    | NC_000019.10:c41454168-41452169 | 1673  | 1686 | +      | AAACAAAAAAAGAA       |
| TCF7L2   | 5.76571 | 0.822119667    | NC_000019.10:c41454168-41452169 | 557   | 570  | +      | AGACTTAAGAGGGT       |
| TCF7L2   | 5.11784 | 0.813165886    | NC_000019.10:c41454168-41452169 | 1256  | 1269 | +      | ATAGGTCAAAGCTC       |
| TCF7L2   | 4.37416 | 0.802888029    | NC_000019.10:c41454168-41452169 | 1146  | 1159 | +      | ACAGAAGAAAATAA       |
| TCF7L2   | 4.27682 | 0.801542837    | NC_000019.10:c41454168-41452169 | 1088  | 1101 | +      | CCTCATCACAGAGG       |
| TP63     | 13.0014 | 0.878762743    | NC_000019.10:c41454168-41452169 | 782   | 801  | +      | AGGCATGCACCACCACGCC  |
| TP63     | 8.92861 | 0.832031784    | NC_000019.10:c41454168-41452169 | 54    | 73   | +      | AAATTTGCATAGGCCTGCTC |

TP63 7.95678 0.820881032 NC\_000019.10:c41454168-41452169 266 285 + CACCATGCCAGCCCTGGAC

---
